# Supplementary material
Source: PubMed Central journal article supplement (PMC7960227)
Supplement: 16-00827.pdf [file 16-00827.pdf]

**On-line Table: Individual perfusion territories and anatomic variants of the Circle of Willis in the patient subgroups**

| Vessel Stenosis/Occlusions                              | No.       | Perfusion Pattern                                          | No.      | Recruitment of Collaterals                              | No.                  | Circle of Willis Anatomy | No.       | Predictability |          |
|---------------------------------------------------------|-----------|------------------------------------------------------------|----------|---------------------------------------------------------|----------------------|--------------------------|-----------|----------------|----------|
|                                                         |           |                                                            |          |                                                         |                      |                          |           | No. = Yes      | No. = No |
| Unilateral ICA stenosis                                 | 21 (44%)  | Symmetric                                                  | 4 (19%)  | —                                                       | —                    | AcomA patent; 1 PcomA    | 2         |                | 2        |
|                                                         |           | Diminished perfusion territory of the stenotic ICA         | 17 (81%) | cICA                                                    | 10 (59%)             | AcomA patent; 2 PcomA    | 2         |                | 2        |
|                                                         |           |                                                            |          |                                                         |                      | AcomA patent; 1 PcomA    | 2         |                | 2        |
|                                                         |           |                                                            |          |                                                         |                      | AcomA patent; 0 PcomA    | 4         | 4              | 4        |
| Bilateral ICA stenosis                                  | 9 (19%)   | Symmetric                                                  | 3 (33%)  | cICA and posterior circulation<br>Posterior circulation | 6 (35%)<br>1 (6%)    | AcomA patent; 2 PcomA    | 6         |                | 6        |
|                                                         |           |                                                            |          |                                                         |                      | AcomA atretic; 1 PcomA   | 1         | 1              | 1        |
|                                                         |           |                                                            |          |                                                         |                      | AcomA atretic; 1 PcomA   | 2         | 2              | 2        |
|                                                         |           |                                                            |          |                                                         |                      | AcomA patent; 0 PcomA    | 1         | 1              | 1        |
| Unilateral ICA occlusion and contralateral ICA stenosis | 15 (31%)  | Diminished perfusion territory of one of the stenotic ICAs | 6 (67%)  | cICA                                                    | 3 (50%)              | AcomA patent; 1 PcomA    | 1         |                | 1        |
|                                                         |           |                                                            |          |                                                         |                      | AcomA patent; 0 PcomA    | 2         | 2              | 2        |
|                                                         |           |                                                            |          |                                                         |                      | AcomA patent; 2 PcomA    | 1         |                | 1        |
|                                                         |           |                                                            |          |                                                         |                      | AcomA atretic; 2 PcomA   | 1         | 1              | 1        |
| Bilateral ICA occlusion                                 | 3 (6%)    |                                                            |          | Posterior circulation<br>cICA                           | 1 (17%)<br>4 (27%)   | AcomA patent; 2 PcomA    | 2         |                | 2        |
|                                                         | 48 (100%) |                                                            |          | cICA and posterior circulation                          | 11 (73%)             | AcomA patent; 1 PcomA    | 2         |                | 2        |
|                                                         |           |                                                            |          |                                                         |                      | AcomA patent; 2 PcomA    | 8         |                | 8        |
|                                                         |           |                                                            |          |                                                         |                      | AcomA patent; 1 PcomA    | 3         | 3              | 3        |
| Sum                                                     |           |                                                            |          | Posterior circulation and ECA                           | 3 (100%)<br>41 (85%) | 2 PcomA                  | 3         | 14 (29%)       | 34 (71%) |
|                                                         |           |                                                            |          |                                                         |                      |                          | 48 (100%) |                |          |

**Note:**—cICA indicates contralateral ICA.
